# Supplementary material for: Cryopreservation and Micropropagation Methods for Conservation of Genetic Resources of Ulmus laevis and Ulmus glabra
Source: MDPI journal article supplement (doi:10.3390/f12081121), 2021-08-21
Supplement: s1 [file s1]

Supplementary Table S1. Information on the plant material (bud explants per treatment) used in 2017 experiments

| Experiment                                                                               | Location / Species                                                             | Transport/ Processing                                                                                                                                           | Collection (Cryo) date                                                | Genotypes | Fresh buds | Prep. date       | Cryo buds | Prep. (thaw) date |
|------------------------------------------------------------------------------------------|--------------------------------------------------------------------------------|-----------------------------------------------------------------------------------------------------------------------------------------------------------------|-----------------------------------------------------------------------|-----------|------------|------------------|-----------|-------------------|
| Media experiment (Figure 3)<br>Multiple hormone combinations with both MS and WPM (2016) | Punkaharju research park / <i>U. laevis</i>                                    | Less than 10 min transport by car, storage as 1 m long branches in a bucket with water in cold storage room (+2 °C)                                             | Fresh buds: Sept. 2016<br>For cryo Oct. 2016 (cryo date 25 Oct. 2016) | E11630    | 9-11       | Sept. 12-Oct. 18 | 14        | Nov. 1-2          |
|                                                                                          |                                                                                |                                                                                                                                                                 |                                                                       | E11631    | 10         | Sept. 12-Oct. 17 | 14        | Nov. 2            |
|                                                                                          |                                                                                |                                                                                                                                                                 |                                                                       | E11632    | 8-12       | Sept. 13-Oct. 17 | 14        | Nov. 2-7          |
|                                                                                          |                                                                                |                                                                                                                                                                 |                                                                       | E11633    | 10         | Sept. 16-Oct. 17 | 14        | Nov. 7-8          |
|                                                                                          |                                                                                |                                                                                                                                                                 |                                                                       | E11634    | 10         | Sept. 20-Oct. 17 | 14        | Nov. 9-10         |
| Cryopreservation experiment (2017)                                                       | Gene reserve collections 205 and 232 in Paimio / Preitilä / <i>U. laevis</i> , | Transferred by car in a cool box with cold blocks, with twigs (5-20 cm) placed in plastic bags with snow / moistened tissue paper, stored in cold room in -5 °C | 24 Jan 2017 (cryo date 9 Feb. 2017)                                   | 0125 01   | 10         | Feb. 13          | 11        | Feb. 28           |
|                                                                                          |                                                                                |                                                                                                                                                                 |                                                                       | 0139 02   | 10         | Feb. 22          | 10        | Feb. 28           |
|                                                                                          |                                                                                |                                                                                                                                                                 |                                                                       | 0344 01   | 10         | Feb. 14          | 10        | Feb. 28           |
|                                                                                          |                                                                                |                                                                                                                                                                 |                                                                       | 0357 05   | 10         | Feb. 10          | 11        | Mar. 2            |
|                                                                                          |                                                                                |                                                                                                                                                                 |                                                                       | 0359 08   | 10         | Feb. 10          | 11        | Mar. 2            |
|                                                                                          |                                                                                |                                                                                                                                                                 |                                                                       | 0360 01   | 10         | Feb. 15          | 12        | Mar. 3            |
|                                                                                          |                                                                                |                                                                                                                                                                 |                                                                       | 0360 04   | 10         | Feb. 9           | 11        | Mar. 3            |
|                                                                                          |                                                                                |                                                                                                                                                                 |                                                                       | 0361 09   | 10         | Feb. 15          | 12        | Mar. 3            |
|                                                                                          |                                                                                |                                                                                                                                                                 |                                                                       | 0362 02   | 10         | Feb. 13          | 12        | Mar. 6            |
|                                                                                          |                                                                                |                                                                                                                                                                 |                                                                       | 0363 01   | 10         | Feb. 13          | 12        | Mar. 6            |
|                                                                                          |                                                                                |                                                                                                                                                                 |                                                                       | 0511 01   | 10         | Feb. 13          | 11        | Mar. 7            |
|                                                                                          |                                                                                |                                                                                                                                                                 |                                                                       | 0512 04   | 10         | Feb. 14          | 10        | Mar. 7            |
|                                                                                          |                                                                                |                                                                                                                                                                 |                                                                       | 0512 06   | 10         | Feb. 13          | 11        | Mar. 7            |
|                                                                                          |                                                                                |                                                                                                                                                                 |                                                                       | 0513 01   | 10         | Feb. 15          | 11        | Mar. 13           |
|                                                                                          |                                                                                |                                                                                                                                                                 |                                                                       | 0514 01   | 10         | Feb. 10          | 10        | Mar. 13           |
|                                                                                          |                                                                                |                                                                                                                                                                 |                                                                       | 0515 01   | 10         | Feb. 9           | 12        | Mar. 13           |
|                                                                                          |                                                                                |                                                                                                                                                                 |                                                                       | 0516 01   | 10         | Feb. 15          | 14        | Mar. 13           |
|                                                                                          |                                                                                |                                                                                                                                                                 |                                                                       | 0516 03   | 10         | Feb. 14          | 11        | Mar. 14           |
|                                                                                          |                                                                                |                                                                                                                                                                 |                                                                       | 0516 08   | 10         | Feb. 14          | 10        | Mar. 14           |
|                                                                                          |                                                                                |                                                                                                                                                                 |                                                                       | 0517 07   | 10         | Feb. 10          | 10        | Mar. 14           |
| Reduced light intensity and DKW test (2017)                                              | Punkaharju research park / <i>U. laevis</i>                                    | Less than 10 min transfer by car, storage as branches (approx. 1 m long) in a bucket with snow in cold storage room (-5 °C)                                     | 27 Nov. 2017 (cryo date 5 Dec. 2017)                                  | E11630    | 4          | Nov. 28          | 10        | Dec. 19           |
|                                                                                          |                                                                                |                                                                                                                                                                 |                                                                       | E11631    | 4          | Nov. 28          | 10        | Dec. 19           |
|                                                                                          |                                                                                |                                                                                                                                                                 |                                                                       | E11632    | 6          | Nov. 28          | 10        | Dec. 19           |
|                                                                                          |                                                                                |                                                                                                                                                                 |                                                                       | E11633    | 5          | Nov. 28          | 10        | Dec. 19           |
|                                                                                          |                                                                                |                                                                                                                                                                 |                                                                       | E11634    | 8          | Nov. 28          | 11        | Dec. 19           |

Supplementary Table S2. Information on the plant material used in 2020 experiments

| Location / Species                                                             | Transport/ Processing                                                                                                                                                         | Collection (Cryo) date                    | Genotype | Buds used | Prep. date (2020) |
|--------------------------------------------------------------------------------|-------------------------------------------------------------------------------------------------------------------------------------------------------------------------------|-------------------------------------------|----------|-----------|-------------------|
| Gene reserve collections 205 and 232 in Paimio / Preitilä / <i>U. laevis</i> , | Transport by mail in a cool box with cold blocks, with twigs (5-20 cm) placed in plastic bags with snow / moistened tissue paper, stored in water bowls in cold room in +2 °C | Fresh buds, 10 Jan. 2020                  | 0139 02  | 10        | Jan. 21           |
|                                                                                |                                                                                                                                                                               |                                           | 0328 04  | 10        | Jan. 22           |
|                                                                                |                                                                                                                                                                               |                                           | 0357 01  | 10        | Jan. 22           |
|                                                                                |                                                                                                                                                                               |                                           | 0359 08  | 10        | Jan. 23           |
|                                                                                |                                                                                                                                                                               |                                           | 0360 03  | 10        | Jan. 22           |
|                                                                                |                                                                                                                                                                               |                                           | 0361 09  | 10        | Jan. 22           |
|                                                                                |                                                                                                                                                                               |                                           | 0511 03  | 10        | Jan. 21           |
|                                                                                |                                                                                                                                                                               |                                           | 0514 08  | 10        | Jan. 22           |
|                                                                                |                                                                                                                                                                               |                                           | 0515 05  | 10        | Jan. 23           |
|                                                                                |                                                                                                                                                                               |                                           | 0517 07  | 10        | Jan. 22           |
|                                                                                | Transport by mail in a cool box with cold blocks, with twigs (5-20 cm) placed in plastic bags with snow and moist tissue paper, stored in cold room (-5 °C)                   | 24 Jan. 2017 (cryo date 9 Feb. 2017)      | 0139 02  | 12        | Jan. 7            |
|                                                                                |                                                                                                                                                                               |                                           | 0359 08  | 10        | Jan. 7            |
|                                                                                |                                                                                                                                                                               |                                           | 0361 09  | 10        | Jan. 8            |
|                                                                                |                                                                                                                                                                               |                                           | 0517 07  | 12        | Jan. 8            |
|                                                                                |                                                                                                                                                                               | 27 February 2019 (cryo date 14 Mar. 2019) | 0328 04  | 10        | Jan. 8            |
|                                                                                |                                                                                                                                                                               |                                           | 0357 01  | 10        | Jan. 8            |
|                                                                                |                                                                                                                                                                               |                                           | 0360 03  | 10        | Jan. 9            |
|                                                                                |                                                                                                                                                                               |                                           | 0511 03  | 10        | Jan. 9            |
|                                                                                |                                                                                                                                                                               |                                           | 0514 08  | 10        | Jan. 9            |
|                                                                                |                                                                                                                                                                               |                                           | 0515 05  | 10        | Jan. 9            |
| Gene reserve collection 184 in Paimio / Preitilä / <i>U. glabra</i>            | Transport by mail in a cool box with cold blocks, with twigs (5-20 cm) placed in plastic bags with snow / moistened tissue paper, stored in water bowls in cold room in +2 °C | Fresh buds: 10 Jan. 2020                  | 0107 01  | 10        | Jan. 21           |
|                                                                                |                                                                                                                                                                               |                                           | 0210 07  | 10        | Jan. 16           |
|                                                                                |                                                                                                                                                                               |                                           | 0212 09  | 10        | Jan. 21           |
|                                                                                |                                                                                                                                                                               |                                           | 0213 03  | 10        | Jan. 16           |
|                                                                                |                                                                                                                                                                               |                                           | 0331 02  | 10        | Jan. 16           |
|                                                                                | Transport by mail in a cool box with cold blocks, with twigs (5-20 cm) placed in plastic bags with snow and moist tissue paper, stored in cold room (-5 °C)                   | 26 Feb. 2019 (cryo date 14 Mar. 2019)     | 0107 01  | 10        | Jan. 9            |
|                                                                                |                                                                                                                                                                               |                                           | 0210 07  | 10        | Jan. 10           |
|                                                                                |                                                                                                                                                                               |                                           | 0212 09  | 9         | Jan. 9            |
|                                                                                |                                                                                                                                                                               |                                           | 0213 03  | 10        | Jan. 10           |
|                                                                                |                                                                                                                                                                               |                                           | 0331 02  | 9         | Jan. 10           |
| Gene reserve collection 192 in Solböle / <i>U. glabra</i>                      | Transport by mail in a cool box with cold blocks, with twigs (5-20 cm) placed in plastic bags with snow / moistened tissue paper, stored in water bowls in cold room in +2 °C | Fresh buds: 9 January 2020                | E3032    | 10        | Jan. 16           |
|                                                                                |                                                                                                                                                                               |                                           | E3033    | 10        | Jan. 15           |
|                                                                                |                                                                                                                                                                               |                                           | E3034    | 10        | Jan. 15           |
|                                                                                |                                                                                                                                                                               |                                           | E3571    | 10        | Jan. 15           |
|                                                                                |                                                                                                                                                                               |                                           | K421     | 10        | Jan. 15           |
|                                                                                | Transport by mail in a cool box with cold blocks, with twigs (5-20 cm) placed in plastic bags with snow and moist tissue paper, stored in cold room (-5 °C)                   | 1 Mar. 2019 (cryo date 14 Mar. 2019)      | E3032    | 10        | Jan. 10           |
|                                                                                |                                                                                                                                                                               |                                           | E3033    | 10        | Jan. 10           |
|                                                                                |                                                                                                                                                                               |                                           | E3034    | 10        | Jan. 10           |
|                                                                                |                                                                                                                                                                               |                                           | E3571    | 10        | Jan. 10           |
|                                                                                |                                                                                                                                                                               |                                           | K421     | 10        | Jan. 10           |

Supplementary Table S3. Information on the plant material used in 2021 experiments

| Location / Species                                  | Transport/ Processing                                                                                                                                              | Collection (Cryo) date                   | Genotype | Buds used (EtOH sterilized) | Prep. (thaw) date | Buds used (H <sub>2</sub> O <sub>2</sub> sterilised ) | Prep. (thaw) date |
|-----------------------------------------------------|--------------------------------------------------------------------------------------------------------------------------------------------------------------------|------------------------------------------|----------|-----------------------------|-------------------|-------------------------------------------------------|-------------------|
| Paimio/ Preitilä<br>205 and 232<br><i>U. laevis</i> | Transport by mail in a cool box with cold blocks, with twigs (5-20 cm) placed in plastic bags with snow and <b>moist</b> tissue paper, stored in cold room (-5 °C) | 18 Jan. 2021<br>(cryo date 27 Jan. 2021) | 0357 06  | 10                          | Feb. 10           | 11                                                    | Feb. 16           |
|                                                     |                                                                                                                                                                    |                                          | 0359 11  | 10                          | Feb. 10           |                                                       |                   |
|                                                     |                                                                                                                                                                    |                                          | 0363 09  | 10                          | Feb. 9            | 10                                                    | Feb. 16           |
|                                                     |                                                                                                                                                                    |                                          | 0512 08  | 10                          | Feb. 9            | 10                                                    | Feb. 16           |
|                                                     |                                                                                                                                                                    |                                          | 0516 09  | 10                          | Feb. 10           | 10                                                    | Feb. 16           |
|                                                     | Transport by mail in a cool box with cold blocks, with twigs (5-20 cm) placed in plastic bags with <b>dry</b> tissue paper, stored in cold room (-5 °C)            | 18 Jan. 2021<br>(cryo date 27 Jan. 2021) | 0357 06  | 10                          | Feb. 10           |                                                       |                   |
|                                                     |                                                                                                                                                                    |                                          | 0359 11  | 10                          | Feb. 10           |                                                       |                   |
|                                                     |                                                                                                                                                                    |                                          | 0363 09  | 10                          | Feb. 9            |                                                       |                   |
|                                                     |                                                                                                                                                                    |                                          | 0512 08  | 10                          | Feb. 9            |                                                       |                   |
|                                                     |                                                                                                                                                                    |                                          | 0516 09  | 10                          | Feb. 10           |                                                       |                   |
| Preitilä/ Preitilä<br>184<br><i>U. glabra</i>       | Transport by mail in a cool box with cold blocks, with twigs (5-20 cm) placed in plastic bags with snow and <b>moist</b> tissue paper, stored in cold room (-5 °C) | 18 Jan. 2021<br>(cryo date 27 Jan. 2021) | 0106 02  | 9                           | Feb. 11           | 9                                                     | Feb. 17           |
|                                                     |                                                                                                                                                                    |                                          | 0107 01  | 10                          | Feb. 12           |                                                       |                   |
|                                                     |                                                                                                                                                                    |                                          | 0109 04  | 8                           | Feb. 11           | 8                                                     | Feb. 17           |
|                                                     |                                                                                                                                                                    |                                          | 0207 07  | 10                          | Feb. 15           |                                                       |                   |
|                                                     |                                                                                                                                                                    |                                          | 0210 07  | 10                          | Feb. 11           | 9                                                     | Feb. 17           |
|                                                     |                                                                                                                                                                    |                                          | 0212 09  | 6                           | Feb. 15           | 8                                                     | Feb. 17           |
|                                                     | Transport by mail in a cool box with cold blocks, with twigs (5-20 cm) placed in plastic bags with <b>dry</b> tissue paper, stored in cold room (-5 °C)            | 18 Jan. 2021<br>(cryo date 27 Jan. 2021) | 0213 03  | 10                          | Feb. 12           |                                                       |                   |
|                                                     |                                                                                                                                                                    |                                          | 0106 02  | 7                           | Feb. 11           |                                                       |                   |
|                                                     |                                                                                                                                                                    |                                          | 0107 01  | 8                           | Feb. 12           |                                                       |                   |
|                                                     |                                                                                                                                                                    |                                          | 0109 04  | 8                           | Feb. 11           |                                                       |                   |
|                                                     |                                                                                                                                                                    |                                          | 0207 07  | 10                          | Feb. 12           |                                                       |                   |
|                                                     |                                                                                                                                                                    |                                          | 0210 07  | 10                          | Feb. 11           |                                                       |                   |
|                                                     |                                                                                                                                                                    |                                          | 0212 09  | 7                           | Feb. 12           |                                                       |                   |
|                                                     |                                                                                                                                                                    |                                          | 0213 03  | 9                           | Feb. 12           |                                                       |                   |
